# Supplementary material for: Heritable DNA methylation marks associated with susceptibility to breast cancer
Source: PubMed Central journal article supplement (PMC5830448; doi:10.1038/s41467-018-03058-6), 2018-02-28
Supplement: 41467_2018_3058_MOESM1_ESM.pdf [file 41467_2018_3058_MOESM1_ESM.pdf]

## Supplementary Information

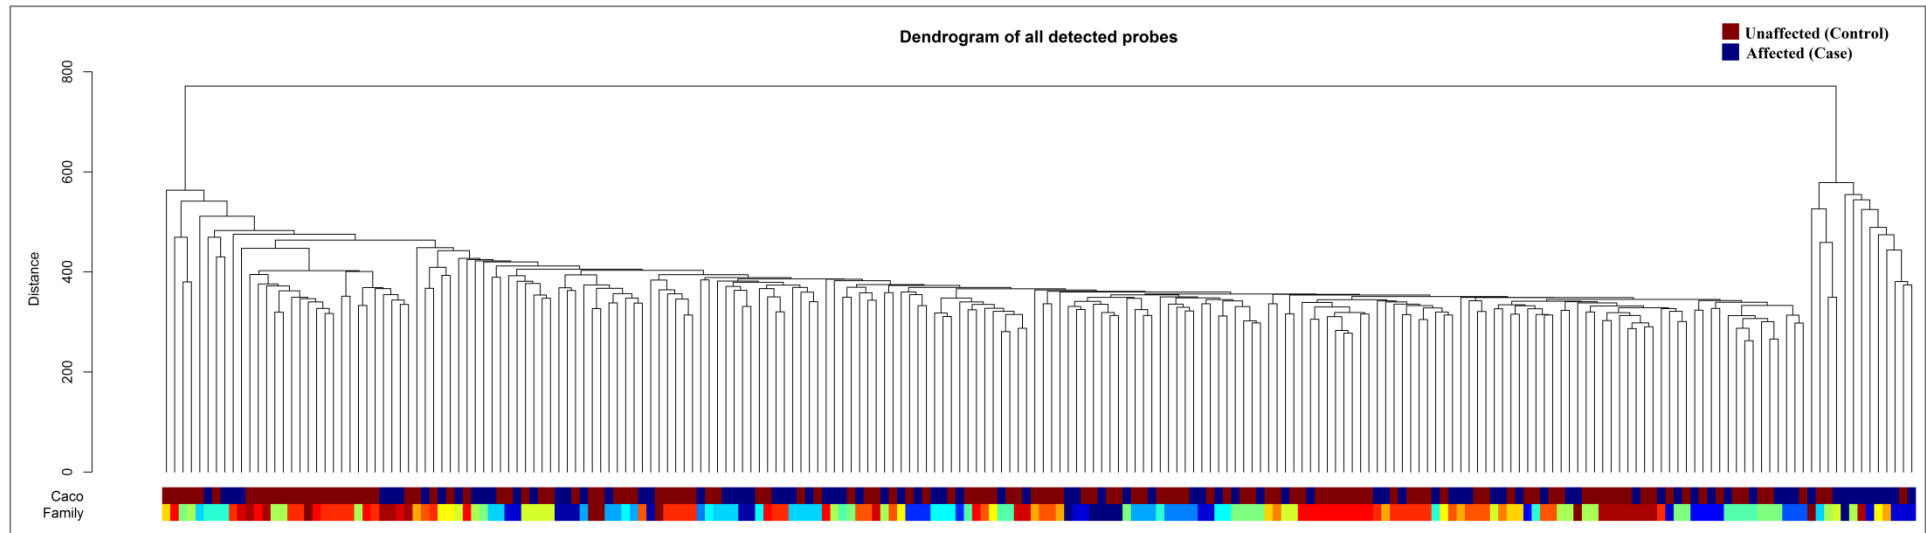

### Supplementary Figure 1

Hierarchical clustering analysis of all samples and all 481,563 detected probes. Cluster analysis shows that there are no batch effects and that all technical replicates tend to cluster close to each other. Some DNA Methylation similarities were shared within some families. Each individual has been color-coded by family and affected status (Caco).

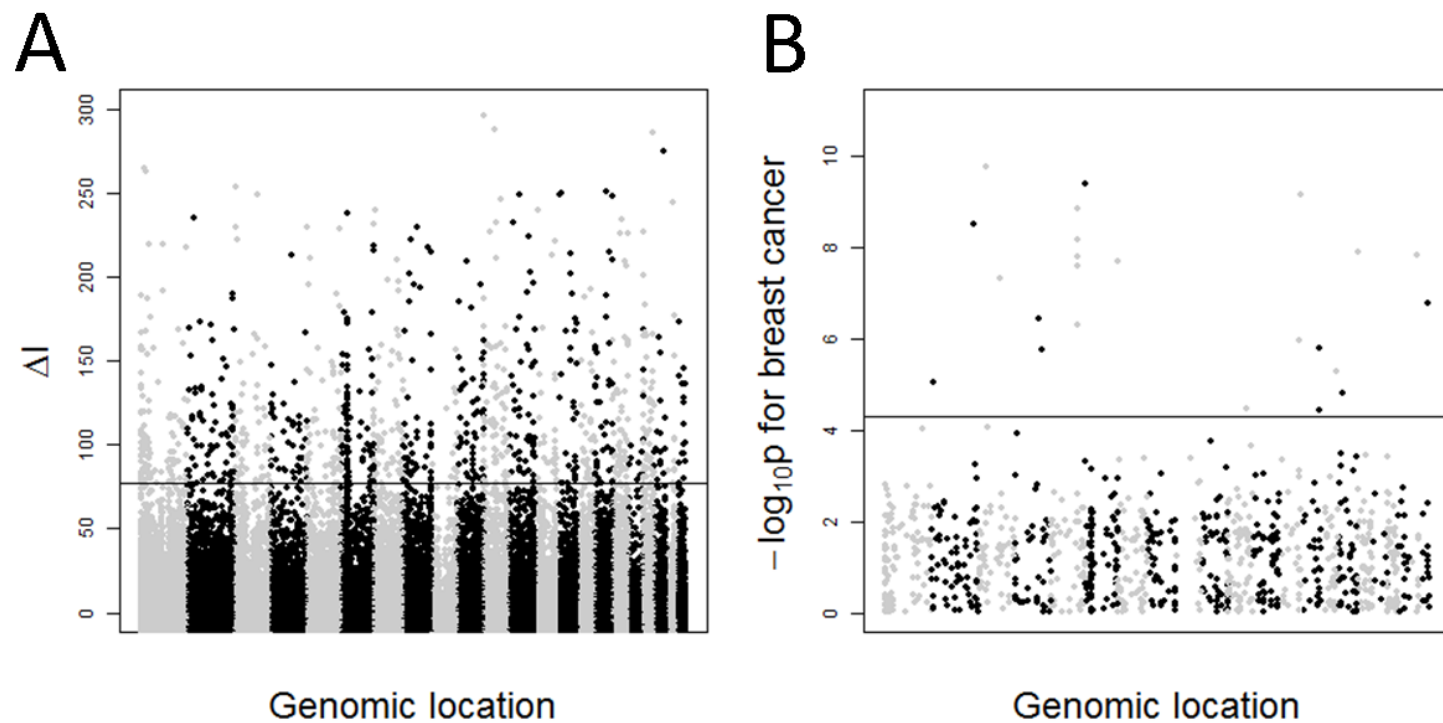

**Supplementary Figure 2**

Manhattan plots showing the statistic  $\Delta I$  by chromosomal location for all sites (A) and the association with breast cancer by chromosomal location for the 1,000 most Mendelian sites (B).

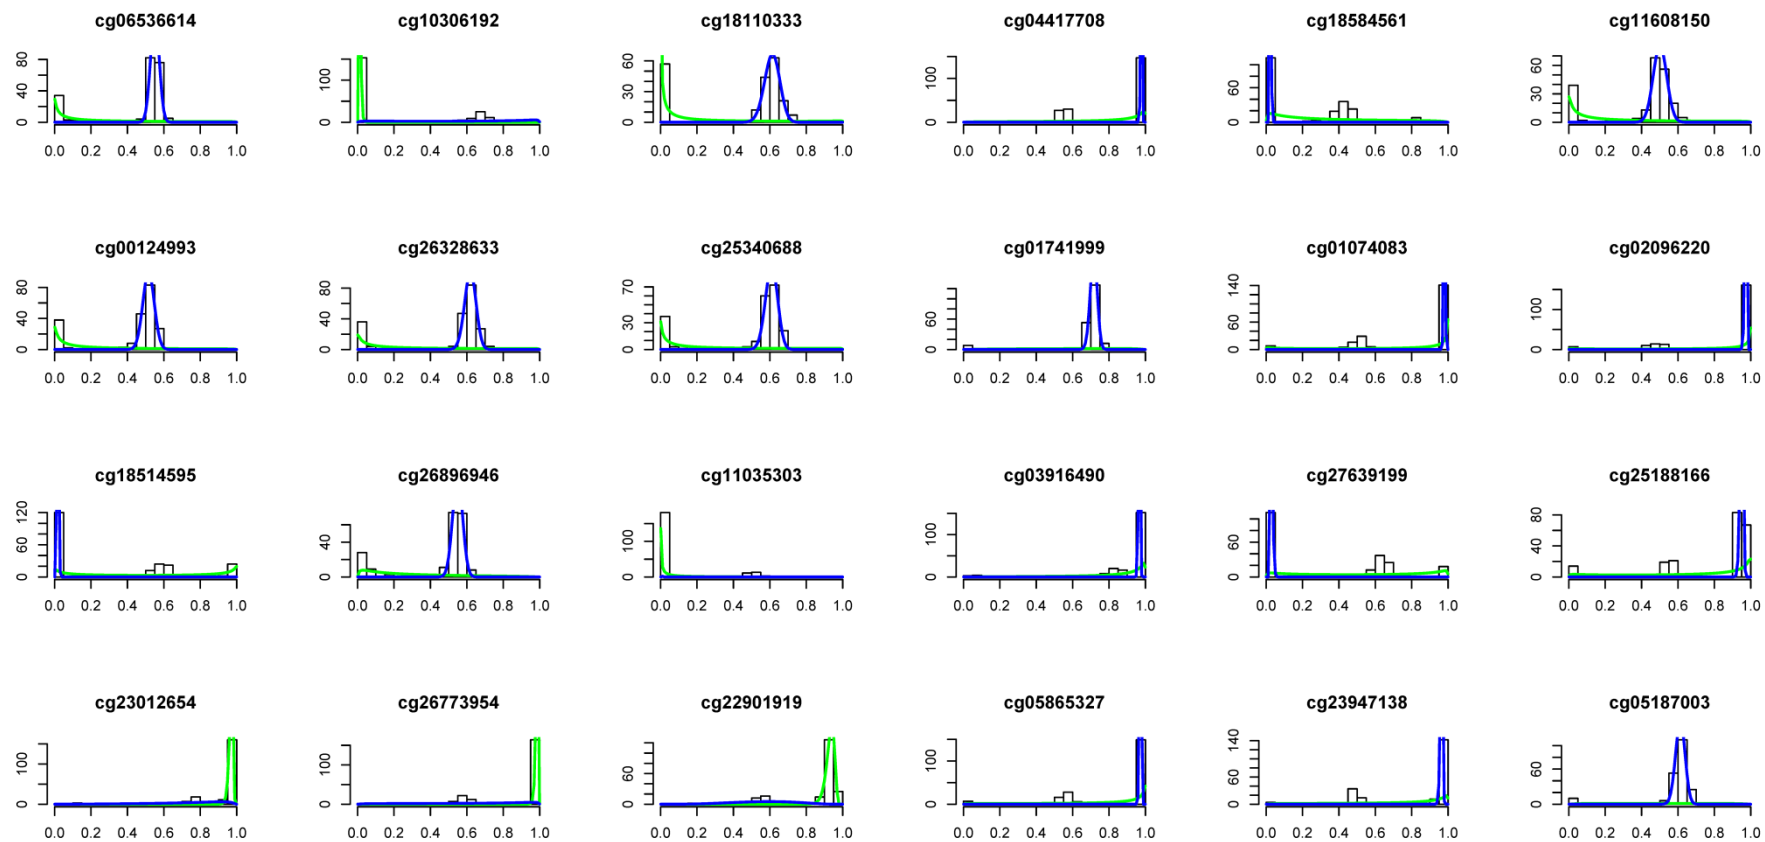

### Supplementary Figure3

Histogram of the logistic-transformed M-values (which are approximately equal to % methylation values) for the 24 probes listed in Table 1, overlaid with the Mendelian model's fitted distribution for carriers (blue lines) and non-carrier (green lines).

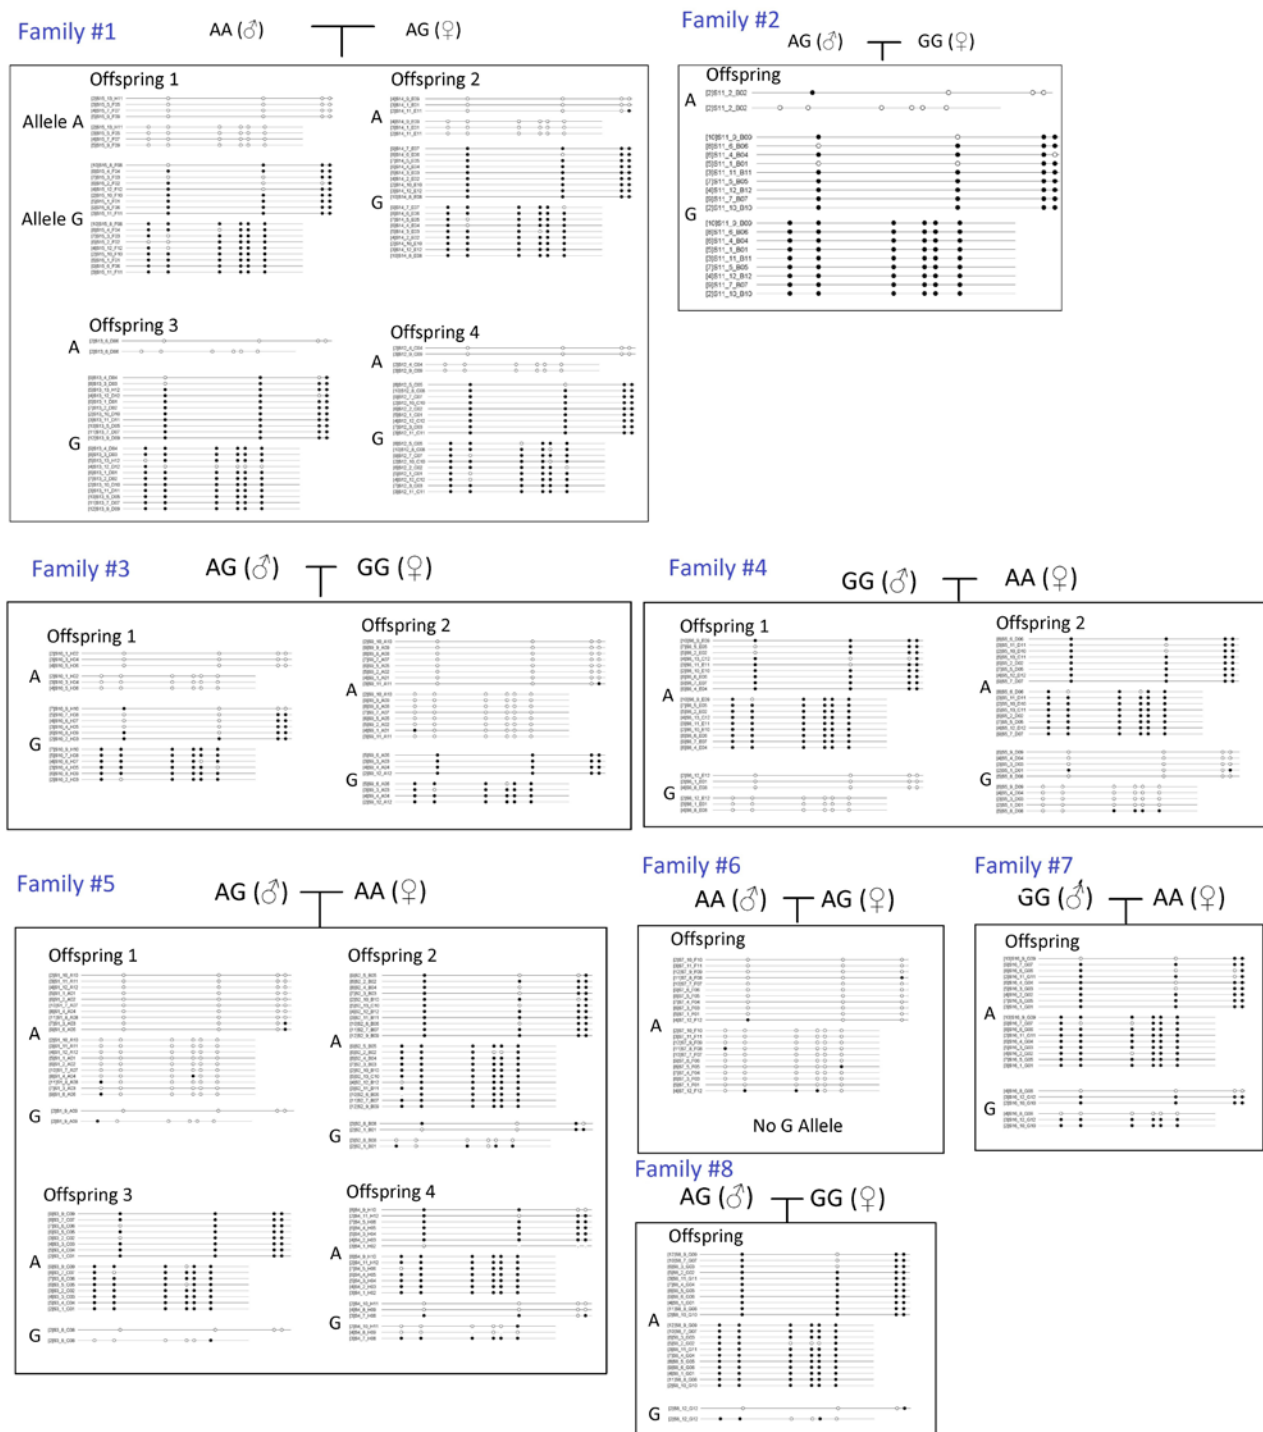

**Supplementary Figure 4**

Epigrams showing clonal bisulfite sequencing results at the *VTRNA2-1* locus (chr5:135415564-135415817) of blood DNA samples from 8 immediate families. Multiple offspring were assessed in 4 families. In total, methylation at 10 CpG sites from 16 offspring individuals was assessed. Filled circle indicates methylation at given CpG site. All individuals were genotyped at rs2346019 and this was used to distinguish the parent alleles in each offspring. The genotypes for each parent are shown on the top. In offspring, the bisulfite sequencing results from individual clones were separated by genotypes at this SNP. Strong allele-specific methylation (ASM) is observed in all individuals and hypermethylation of the maternally inherited allele was apparent in most individuals. One individual had obvious loss of methylation in both paternal and maternal alleles (Family #5 Offspring 1).

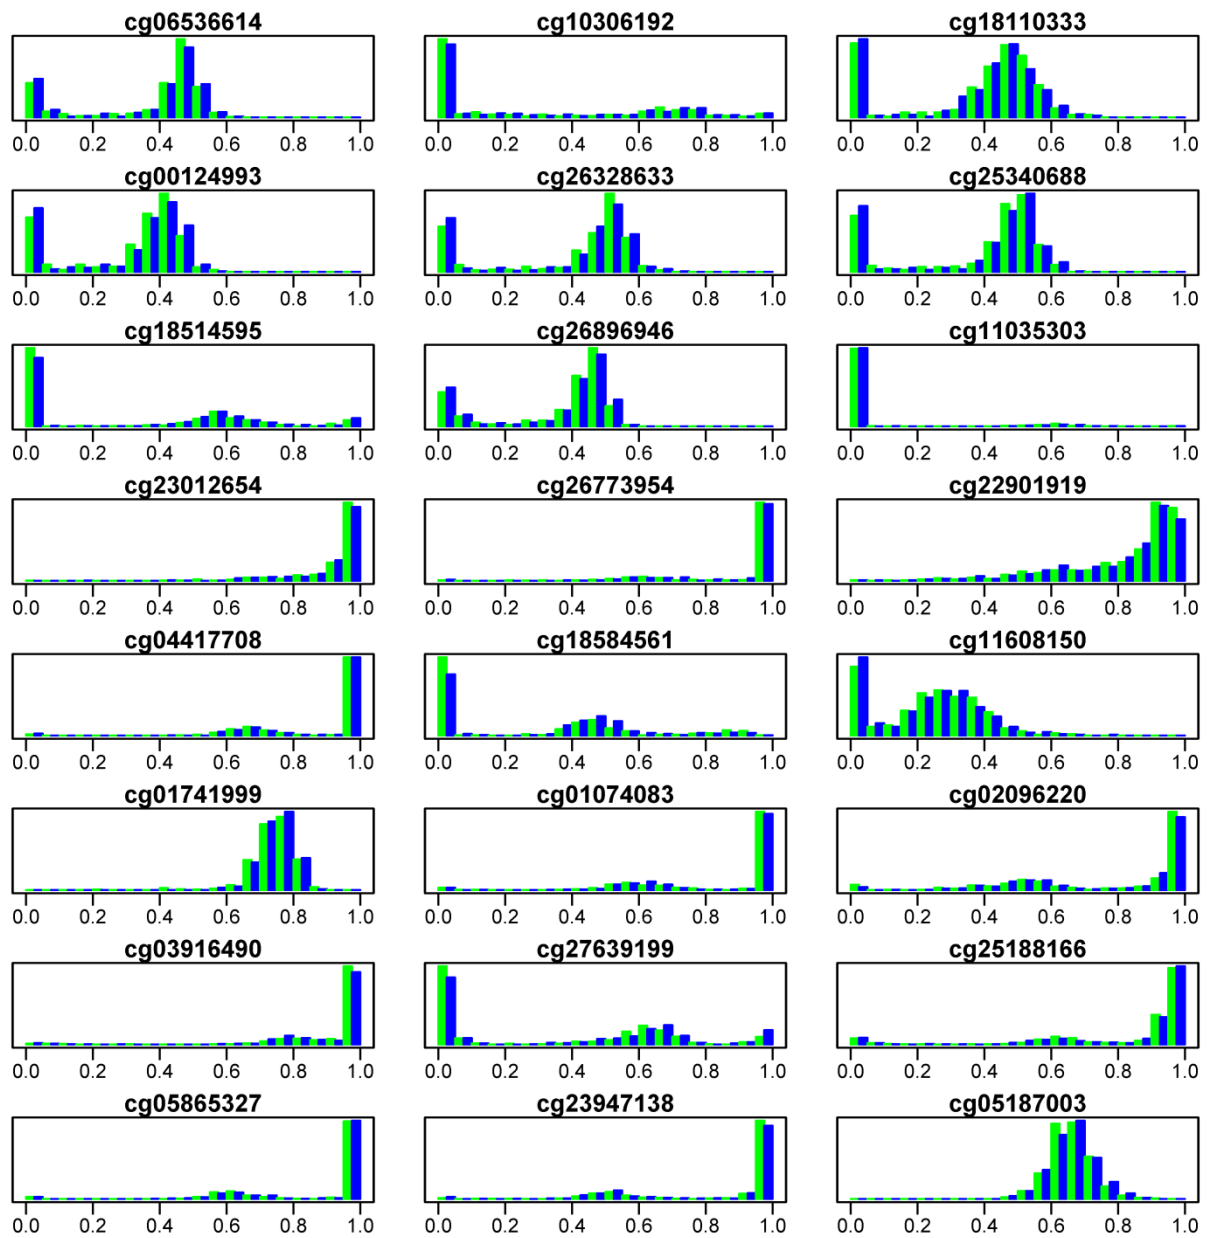

**Supplementary Figure 5**

Histograms for the Melbourne Collaborative Cohort Study cases (blue bars) and controls (green bars), showing the distributions of logistic-transformed M-values of the 24 heritable methylation sites that were associated with breast cancer risk in the family-based analyses.

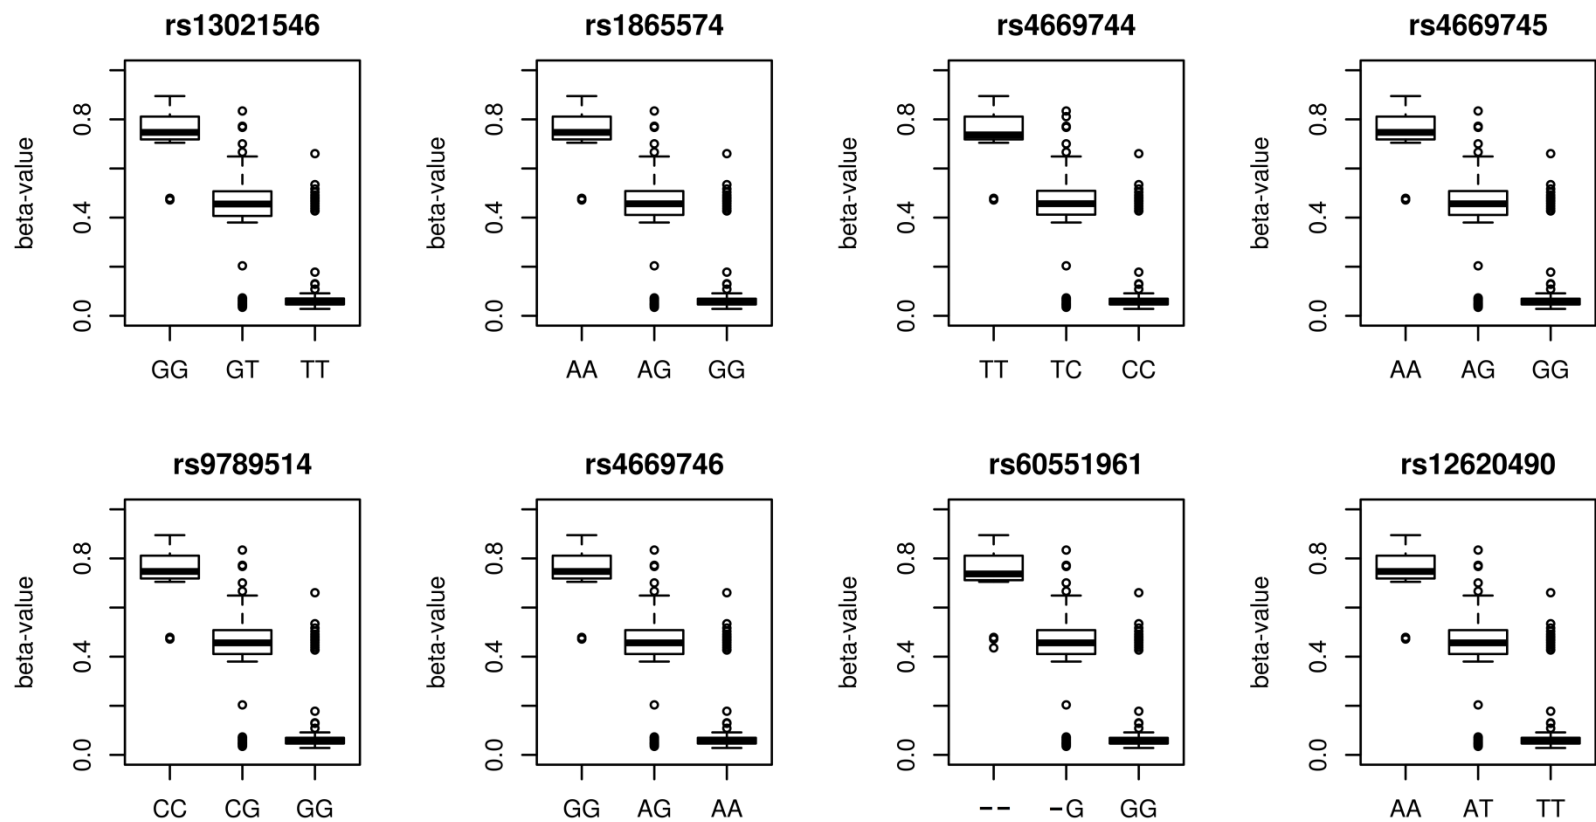

**Supplementary Figure 6**

Boxplots showing the association between DNA methylation and genetic variants within 1kb of cg18584561 (*GREB1*). Imputed genotypes at 8 proximal SNPs from iCOGS (Breast Cancer Association Consortium<sup>37</sup>) are shown on X-axis and Beta (Methylation) values are shown on Y-axis.

## Supplementary Tables

### Supplementary Table 1

The number of breast cancer cases and controls who are hypo-, hemi- or hypermethylated (defined by beta in 0.0-0.2, 0.2-0.8 or 0.8-1.0, respectively) for the 24 heritable probes whose carrier probabilities were found in other analyses to be associated with breast cancer, with a p-value for association between this categorised methylation variable and affected status.

| Probe      | Gene              | Hypomethylated |          | Hemimethylated |          | Hypermethylated |          | p-value |
|------------|-------------------|----------------|----------|----------------|----------|-----------------|----------|---------|
|            |                   | Cases          | Controls | Cases          | Controls | Cases           | Controls |         |
| cg06536614 | MIR886 (VTRNA2-1) | 15             | 19       | 68             | 87       | 0               | 0        | 1       |
| cg10306192 | MMP27             | 61             | 76       | 21             | 28       | 1               | 2        | 0.9     |
| cg18110333 | DUSP22            | 16             | 32       | 67             | 74       | 0               | 0        | 0.09    |
| cg00124993 | MIR886 (VTRNA2-1) | 17             | 20       | 66             | 86       | 0               | 0        | 0.9     |
| cg26328633 | MIR886 (VTRNA2-1) | 17             | 19       | 66             | 87       | 0               | 0        | 0.7     |
| cg25340688 | MIR886 (VTRNA2-1) | 17             | 19       | 66             | 87       | 0               | 0        | 0.7     |
| cg18514595 | -                 | 47             | 63       | 26             | 32       | 10              | 11       | 0.9     |
| cg26896946 | MIR886 (VTRNA2-1) | 14             | 19       | 69             | 87       | 0               | 0        | 1       |
| cg11035303 | ANO10             | 73             | 93       | 10             | 13       | 0               | 0        | 1       |
| cg23012654 | -                 | 2              | 0        | 19             | 16       | 62              | 90       | 0.08    |
| cg26773954 | -                 | 2              | 0        | 20             | 20       | 61              | 86       | 0.2     |
| cg22901919 | CLGN              | 0              | 0        | 27             | 22       | 56              | 84       | 0.09    |
| cg04417708 | ZZEF1             | 0              | 0        | 21             | 31       | 62              | 75       | 0.6     |
| cg18584561 | GREB1             | 45             | 59       | 36             | 46       | 2               | 1        | 0.8     |
| cg11608150 | -                 | 17             | 20       | 66             | 86       | 0               | 0        | 0.9     |
| cg01741999 | PNKD              | 9              | 2        | 74             | 104      | 0               | 0        | 0.01    |
| cg01074083 | XYLT1             | 5              | 3        | 23             | 27       | 55              | 76       | 0.5     |
| cg02096220 | -                 | 3              | 4        | 19             | 19       | 61              | 83       | 0.7     |
| cg03916490 | C7orf50           | 3              | 5        | 18             | 22       | 62              | 79       | 1       |
| cg27639199 | TMC3              | 40             | 62       | 32             | 39       | 11              | 5        | 0.08    |
| cg25188166 | -                 | 5              | 8        | 18             | 23       | 60              | 75       | 1       |
| cg05865327 | PPP2R5C           | 4              | 1        | 28             | 22       | 51              | 83       | 0.02    |
| cg23947138 | RASA3             | 1              | 1        | 19             | 27       | 63              | 78       | 0.9     |
| cg05187003 | IL10RB            | 9              | 1        | 74             | 105      | 0               | 0        | 0.005   |

**Supplementary Table 2**

The mean carrier probabilities for cases and controls, and p-value for a difference between them, for the 24 heritable probes whose carrier probabilities were found in other analyses to be associated with breast cancer.

| Probe      | Gene              | Mean carrier probabilities (95% confidence interval) for |                     | p-value  |
|------------|-------------------|----------------------------------------------------------|---------------------|----------|
|            |                   | Cases                                                    | Controls            |          |
| cg06536614 | MIR886 (VTRNA2-1) | 0.461 (0.415-0.507)                                      | 0.222 (0.202-0.243) | 1.77E-11 |
| cg10306192 | MMP27             | 0.294 (0.253-0.334)                                      | 0.139 (0.121-0.156) | 1.53E-06 |
| cg18110333 | DUSP22            | 0.446 (0.402-0.49)                                       | 0.204 (0.184-0.223) | 1.93E-12 |
| cg00124993 | MIR886 (VTRNA2-1) | 0.433 (0.389-0.477)                                      | 0.212 (0.192-0.231) | 7.30E-11 |
| cg26328633 | MIR886 (VTRNA2-1) | 0.432 (0.388-0.475)                                      | 0.211 (0.191-0.23)  | 4.78E-11 |
| cg25340688 | MIR886 (VTRNA2-1) | 0.43 (0.387-0.474)                                       | 0.211 (0.192-0.231) | 8.05E-11 |
| cg18514595 | -                 | 0.404 (0.361-0.448)                                      | 0.193 (0.174-0.212) | 8.32E-10 |
| cg26896946 | MIR886 (VTRNA2-1) | 0.442 (0.399-0.485)                                      | 0.212 (0.193-0.231) | 6.53E-12 |
| cg11035303 | ANO10             | 0.463 (0.422-0.505)                                      | 0.218 (0.2-0.236)   | 3.18E-14 |
| cg23012654 | -                 | 0.197 (0.162-0.231)                                      | 0.083 (0.067-0.098) | 8.23E-05 |
| cg26773954 | -                 | 0.259 (0.222-0.297)                                      | 0.101 (0.085-0.118) | 5.67E-07 |
| cg22901919 | CLGN              | 0.218 (0.182-0.253)                                      | 0.078 (0.063-0.094) | 6.23E-06 |
| cg04417708 | ZZEF1             | 0.402 (0.361-0.442)                                      | 0.182 (0.164-0.2)   | 1.14E-11 |
| cg18584561 | GREB1             | 0.315 (0.274-0.355)                                      | 0.149 (0.132-0.167) | 2.01E-07 |
| cg11608150 | -                 | 0.395 (0.354-0.436)                                      | 0.199 (0.181-0.217) | 5.62E-10 |
| cg01741999 | PNKD              | 0.422 (0.382-0.463)                                      | 0.214 (0.196-0.232) | 3.46E-11 |
| cg01074083 | XYLT1             | 0.339 (0.3-0.379)                                        | 0.175 (0.158-0.193) | 8.15E-08 |
| cg02096220 | -                 | 0.37 (0.331-0.41)                                        | 0.186 (0.168-0.203) | 2.44E-09 |
| cg03916490 | C7orf50           | 0.372 (0.331-0.413)                                      | 0.176 (0.158-0.194) | 1.16E-09 |
| cg27639199 | TMC3              | 0.358 (0.315-0.4)                                        | 0.174 (0.156-0.193) | 1.19E-07 |
| cg25188166 | -                 | 0.344 (0.304-0.384)                                      | 0.156 (0.138-0.174) | 4.83E-09 |
| cg05865327 | PPP2R5C           | 0.341 (0.301-0.381)                                      | 0.17 (0.152-0.187)  | 2.35E-08 |
| cg23947138 | RASA3             | 0.418 (0.376-0.459)                                      | 0.197 (0.178-0.215) | 7.89E-12 |
| cg05187003 | IL10RB            | 0.406 (0.367-0.445)                                      | 0.204 (0.187-0.221) | 2.84E-11 |



### Supplementary Table 3

Sensitivity analyses for the associations with risk of breast cancer in the MCCS, at the 24 methylation sites showing heritable epimutations and associated with breast cancer in high-risk families.

**Model 1: Adjustment for BMI (continuous), cigarette smoking (Never; Former, Current), alcohol drinking (4 categories), time between blood collection and diagnosis, sample type (DBS, PBMC, BC), and matching variables (year of birth, year of blood draw, country of birth, and sample type for the vast majority of case-control pairs)**

| Site              | Chr.      | Position         | UCSC ref                 | OR <sup>a</sup> | 95% CI           | p            |
|-------------------|-----------|------------------|--------------------------|-----------------|------------------|--------------|
| cg06536614        | 5         | 135416381        | <i>MIR886 (VTRNA2-1)</i> | 0.98            | 0.90-1.05        | 0.497        |
| cg10306192        | 11        | 102576374        | <i>MMP27</i>             | 1.03            | 0.98-1.08        | 0.235        |
| cg18110333        | 6         | 292329           | <i>DUSP22</i>            | 0.98            | 0.93-1.04        | 0.588        |
| cg00124993        | 5         | 135416412        | <i>MIR886 (VTRNA2-1)</i> | 0.98            | 0.91-1.06        | 0.667        |
| cg26328633        | 5         | 135416394        | <i>MIR886 (VTRNA2-1)</i> | 0.99            | 0.91-1.07        | 0.761        |
| cg25340688        | 5         | 135416398        | <i>MIR886 (VTRNA2-1)</i> | 0.97            | 0.90-1.05        | 0.441        |
| cg18514595        | 22        | 49579968         | <i>unannotated</i>       | 1.05            | 0.99-1.11        | 0.077        |
| cg26896946        | 5         | 135416405        | <i>MIR886 (VTRNA2-1)</i> | 0.95            | 0.85-1.07        | 0.426        |
| cg11035303        | 3         | 43465503         | <i>ANO10</i>             | 1.00            | 0.93-1.08        | 0.894        |
| cg23012654        | 14        | 97493395         | <i>unannotated</i>       | 0.97            | 0.88-1.06        | 0.503        |
| cg26773954        | 13        | 111969980        | <i>unannotated</i>       | 1.01            | 0.94-1.08        | 0.813        |
| cg22901919        | 4         | 141317067        | <i>CLGN</i>              | 0.93            | 0.83-1.04        | 0.224        |
| cg04417708        | 17        | 4043867          | <i>ZZEF1</i>             | 1.00            | 0.93-1.08        | 0.989        |
| <b>cg18584561</b> | <b>2</b>  | <b>11682017</b>  | <b><i>GREB1</i></b>      | <b>1.08</b>     | <b>1.01-1.14</b> | <b>0.015</b> |
| cg11608150        | 5         | 135415948        | <i>unannotated</i>       | 0.96            | 0.90-1.04        | 0.311        |
| <b>cg01741999</b> | <b>2</b>  | <b>219137824</b> | <b><i>PNKD</i></b>       | <b>2.16</b>     | <b>1.11-4.21</b> | <b>0.027</b> |
| cg01074083        | 16        | 17516862         | <i>XYLT1</i>             | 0.99            | 0.93-1.06        | 0.749        |
| cg02096220        | 4         | 129212177        | <i>unannotated</i>       | 1.01            | 0.95-1.07        | 0.743        |
| <b>cg03916490</b> | <b>7</b>  | <b>1080558</b>   | <b><i>C7orf50</i></b>    | <b>0.87</b>     | <b>0.78-0.97</b> | <b>0.012</b> |
| <b>cg27639199</b> | <b>15</b> | <b>81666528</b>  | <b><i>TMC3</i></b>       | <b>1.07</b>     | <b>1.01-1.13</b> | <b>0.018</b> |
| cg25188166        | 3         | 119420208        | <i>unannotated</i>       | 0.98            | 0.91-1.05        | 0.551        |
| cg05865327        | 14        | 102274741        | <i>PPP2R5C</i>           | 1.02            | 0.94-1.11        | 0.589        |
| cg23947138        | 13        | 114782778        | <i>RASA3</i>             | 0.94            | 0.87-1.01        | 0.091        |
| cg05187003        | 21        | 34641507         | <i>IL10RB</i>            | 0.99            | 0.62-1.57        | 0.950        |

**Model 1 (SD). Same as Model 1 with results given per 1 Standard deviation of M-values (Table 1) + associations by breast cancer subtype**

| Site              | Chr.      | Position         | UCSC ref                 | OR <sup>a</sup> | 95% CI           | p            | ER-<br>(N=317) |                  | ER+<br>(N=106) |                  | Heterogeneity |
|-------------------|-----------|------------------|--------------------------|-----------------|------------------|--------------|----------------|------------------|----------------|------------------|---------------|
|                   |           |                  |                          |                 |                  |              | OR             | 95% CI           | OR             | 95% CI           | p             |
| <b>cg06536614</b> | <b>5</b>  | <b>135416381</b> | <b>MIR886 (VTRNA2-1)</b> | <b>0.95</b>     | <b>0.83-1.10</b> | <b>0.497</b> | <b>1.02</b>    | <b>0.86-1.21</b> | <b>0.71</b>    | <b>0.53-0.96</b> | <b>0.034</b>  |
| cg10306192        | 11        | 102576374        | MMP27                    | 1.09            | 0.94-1.27        | 0.235        | 1.05           | 0.88-1.24        | 1.18           | 0.88-1.58        | 0.500         |
| cg18110333        | 6         | 292329           | DUSP22                   | 0.96            | 0.83-1.11        | 0.588        | 1.03           | 0.87-1.21        | 0.78           | 0.57-1.07        | 0.128         |
| cg00124993        | 5         | 135416412        | MIR886 (VTRNA2-1)        | 0.97            | 0.84-1.12        | 0.667        | 1.01           | 0.85-1.20        | 0.77           | 0.57-1.04        | 0.110         |
| cg26328633        | 5         | 135416394        | MIR886 (VTRNA2-1)        | 0.98            | 0.85-1.13        | 0.761        | 1.03           | 0.87-1.22        | 0.78           | 0.59-1.04        | 0.101         |
| cg25340688        | 5         | 135416398        | MIR886 (VTRNA2-1)        | 0.95            | 0.82-1.09        | 0.441        | 0.99           | 0.84-1.17        | 0.76           | 0.57-1.03        | 0.132         |
| cg18514595        | 22        | 49579968         | unannotated              | 1.14            | 0.99-1.31        | 0.077        | 1.08           | 0.92-1.28        | 1.24           | 0.93-1.65        | 0.436         |
| cg26896946        | 5         | 135416405        | MIR886 (VTRNA2-1)        | 0.94            | 0.82-1.09        | 0.426        | 0.99           | 0.84-1.18        | 0.74           | 0.55-1.00        | 0.090         |
| cg11035303        | 3         | 43465503         | ANO10                    | 1.01            | 0.88-1.16        | 0.894        | 1.07           | 0.91-1.25        | 0.90           | 0.65-1.23        | 0.336         |
| cg23012654        | 14        | 97493395         | unannotated              | 0.95            | 0.83-1.10        | 0.503        | 0.98           | 0.83-1.16        | 0.90           | 0.68-1.19        | 0.594         |
| cg26773954        | 13        | 111969980        | unannotated              | 1.02            | 0.88-1.17        | 0.813        | 0.99           | 0.84-1.18        | 1.08           | 0.82-1.42        | 0.602         |
| cg22901919        | 4         | 141317067        | CLGN                     | 0.91            | 0.78-1.06        | 0.224        | 0.91           | 0.77-1.09        | 0.92           | 0.67-1.25        | 0.989         |
| cg04417708        | 17        | 4043867          | ZZEF1                    | 1.00            | 0.87-1.15        | 0.989        | 1.00           | 0.86-1.17        | 1.01           | 0.75-1.36        | 0.973         |
| <b>cg18584561</b> | <b>2</b>  | <b>11682017</b>  | <b>GREB1</b>             | <b>1.18</b>     | <b>1.03-1.36</b> | <b>0.015</b> | <b>1.18</b>    | <b>1.01-1.38</b> | <b>1.14</b>    | <b>0.86-1.51</b> | <b>0.809</b>  |
| cg11608150        | 5         | 135415948        | unannotated              | 0.93            | 0.80-1.07        | 0.311        | 0.94           | 0.80-1.12        | 0.79           | 0.58-1.07        | 0.302         |
| <b>cg01741999</b> | <b>2</b>  | <b>219137824</b> | <b>PNKD</b>              | <b>1.26</b>     | <b>1.03-1.54</b> | <b>0.027</b> | <b>1.21</b>    | <b>0.97-1.50</b> | <b>1.57</b>    | <b>0.96-2.57</b> | <b>0.324</b>  |
| <b>cg01074083</b> | <b>16</b> | <b>17516862</b>  | <b>XYLT1</b>             | <b>0.98</b>     | <b>0.84-1.13</b> | <b>0.749</b> | <b>1.08</b>    | <b>0.90-1.29</b> | <b>0.72</b>    | <b>0.53-0.98</b> | <b>0.021</b>  |
| <b>cg02096220</b> | <b>4</b>  | <b>129212177</b> | <b>unannotated</b>       | <b>1.02</b>     | <b>0.89-1.18</b> | <b>0.743</b> | <b>0.94</b>    | <b>0.80-1.11</b> | <b>1.31</b>    | <b>0.97-1.78</b> | <b>0.050</b>  |
| <b>cg03916490</b> | <b>7</b>  | <b>1080558</b>   | <b>C7orf50</b>           | <b>0.83</b>     | <b>0.72-0.96</b> | <b>0.012</b> | <b>0.81</b>    | <b>0.68-0.96</b> | <b>0.92</b>    | <b>0.70-1.20</b> | <b>0.458</b>  |
| <b>cg27639199</b> | <b>15</b> | <b>81666528</b>  | <b>TMC3</b>              | <b>1.19</b>     | <b>1.03-1.36</b> | <b>0.018</b> | <b>1.18</b>    | <b>1.00-1.40</b> | <b>1.18</b>    | <b>0.90-1.56</b> | <b>0.996</b>  |
| cg25188166        | 3         | 119420208        | unannotated              | 0.96            | 0.83-1.10        | 0.551        | 0.98           | 0.83-1.15        | 0.92           | 0.71-1.20        | 0.714         |
| cg05865327        | 14        | 102274741        | PPP2R5C                  | 1.04            | 0.90-1.20        | 0.589        | 1.01           | 0.86-1.20        | 1.09           | 0.81-1.45        | 0.688         |
| <b>cg23947138</b> | <b>13</b> | <b>114782778</b> | <b>RASA3</b>             | <b>0.89</b>     | <b>0.78-1.02</b> | <b>0.091</b> | <b>0.80</b>    | <b>0.68-0.94</b> | <b>1.24</b>    | <b>0.93-1.65</b> | <b>0.008</b>  |
| <b>cg05187003</b> | <b>21</b> | <b>34641507</b>  | <b>IL10RB</b>            | <b>1.00</b>     | <b>0.86-1.15</b> | <b>0.950</b> | <b>0.99</b>    | <b>0.84-1.17</b> | <b>1.03</b>    | <b>0.76-1.38</b> | <b>0.839</b>  |

**Model 2. Model 1 (SD) + additional adjustment for white blood cell composition (estimated with the Houseman algorithm)**

| <b>Site</b>       | <b>Chr.</b> | <b>Position</b>  | <b>UCSC ref</b>          | <b>OR<sup>a</sup></b> | <b>95% CI</b>    | <b>p</b>     |
|-------------------|-------------|------------------|--------------------------|-----------------------|------------------|--------------|
| cg06536614        | 5           | 135416381        | <i>MIR886 (VTRNA2-1)</i> | 0.97                  | 0.84-1.12        | 0.676        |
| cg10306192        | 11          | 102576374        | <i>MMP27</i>             | 1.09                  | 0.93-1.27        | 0.292        |
| cg18110333        | 6           | 292329           | <i>DUSP22</i>            | 0.96                  | 0.83-1.12        | 0.612        |
| cg00124993        | 5           | 135416412        | <i>MIR886 (VTRNA2-1)</i> | 0.99                  | 0.85-1.15        | 0.902        |
| cg26328633        | 5           | 135416394        | <i>MIR886 (VTRNA2-1)</i> | 0.99                  | 0.86-1.15        | 0.939        |
| cg25340688        | 5           | 135416398        | <i>MIR886 (VTRNA2-1)</i> | 0.96                  | 0.83-1.12        | 0.620        |
| cg18514595        | 22          | 49579968         | <i>unannotated</i>       | 1.10                  | 0.95-1.28        | 0.183        |
| cg26896946        | 5           | 135416405        | <i>MIR886 (VTRNA2-1)</i> | 0.96                  | 0.83-1.11        | 0.608        |
| cg11035303        | 3           | 43465503         | <i>ANO10</i>             | 1.02                  | 0.88-1.17        | 0.801        |
| cg23012654        | 14          | 97493395         | <i>unannotated</i>       | 0.98                  | 0.85-1.13        | 0.781        |
| cg26773954        | 13          | 111969980        | <i>unannotated</i>       | 1.01                  | 0.88-1.17        | 0.875        |
| cg22901919        | 4           | 141317067        | <i>CLGN</i>              | 0.95                  | 0.81-1.12        | 0.576        |
| cg04417708        | 17          | 4043867          | <i>ZZEF1</i>             | 0.99                  | 0.86-1.15        | 0.929        |
| <b>cg18584561</b> | <b>2</b>    | <b>11682017</b>  | <b><i>GREB1</i></b>      | <b>1.18</b>           | <b>1.02-1.35</b> | <b>0.022</b> |
| cg11608150        | 5           | 135415948        | <i>unannotated</i>       | 0.94                  | 0.81-1.09        | 0.449        |
| <b>cg01741999</b> | <b>2</b>    | <b>219137824</b> | <b><i>PNKD</i></b>       | <b>1.20</b>           | <b>0.98-1.48</b> | <b>0.085</b> |
| cg01074083        | 16          | 17516862         | <i>XYLT1</i>             | 0.99                  | 0.85-1.15        | 0.909        |
| cg02096220        | 4           | 129212177        | <i>unannotated</i>       | 1.02                  | 0.89-1.18        | 0.759        |
| <b>cg03916490</b> | <b>7</b>    | <b>1080558</b>   | <b><i>C7orf50</i></b>    | <b>0.81</b>           | <b>0.70-0.94</b> | <b>0.006</b> |
| <b>cg27639199</b> | <b>15</b>   | <b>81666528</b>  | <b><i>TMC3</i></b>       | <b>1.17</b>           | <b>1.01-1.35</b> | <b>0.033</b> |
| cg25188166        | 3           | 119420208        | <i>unannotated</i>       | 1.01                  | 0.87-1.17        | 0.918        |
| cg05865327        | 14          | 102274741        | <i>PPP2R5C</i>           | 0.99                  | 0.85-1.15        | 0.914        |
| cg23947138        | 13          | 114782778        | <i>RASA3</i>             | 0.89                  | 0.77-1.02        | 0.085        |
| cg05187003        | 21          | 34641507         | <i>IL10RB</i>            | 0.95                  | 0.82-1.10        | 0.504        |

**Model 3. Model 1 + additional adjustment for age at menarche, menopausal status, number of live births, and use of hormonal replacement therapy**

| Site              | Chr.      | Position         | UCSC ref                 | OR <sup>a</sup> | 95% CI           | p            |
|-------------------|-----------|------------------|--------------------------|-----------------|------------------|--------------|
| cg06536614        | 5         | 135416381        | <i>MIR886 (VTRNA2-1)</i> | 0.96            | 0.83-1.11        | 0.554        |
| cg10306192        | 11        | 102576374        | <i>MMP27</i>             | 1.10            | 0.95-1.28        | 0.219        |
| cg18110333        | 6         | 292329           | <i>DUSP22</i>            | 0.98            | 0.85-1.14        | 0.831        |
| cg00124993        | 5         | 135416412        | <i>MIR886 (VTRNA2-1)</i> | 0.98            | 0.84-1.13        | 0.773        |
| cg26328633        | 5         | 135416394        | <i>MIR886 (VTRNA2-1)</i> | 0.99            | 0.85-1.14        | 0.849        |
| cg25340688        | 5         | 135416398        | <i>MIR886 (VTRNA2-1)</i> | 0.95            | 0.82-1.1         | 0.523        |
| cg18514595        | 22        | 49579968         | <i>unannotated</i>       | 1.13            | 0.98-1.31        | 0.104        |
| cg26896946        | 5         | 135416405        | <i>MIR886 (VTRNA2-1)</i> | 0.95            | 0.82-1.1         | 0.500        |
| cg11035303        | 3         | 43465503         | <i>ANO10</i>             | 1.02            | 0.88-1.17        | 0.825        |
| cg23012654        | 14        | 97493395         | <i>unannotated</i>       | 0.94            | 0.82-1.09        | 0.419        |
| cg26773954        | 13        | 111969980        | <i>unannotated</i>       | 1.03            | 0.89-1.19        | 0.728        |
| cg22901919        | 4         | 141317067        | <i>CLGN</i>              | 0.91            | 0.78-1.07        | 0.262        |
| cg04417708        | 17        | 4043867          | <i>ZZEF1</i>             | 1.01            | 0.88-1.17        | 0.838        |
| <b>cg18584561</b> | <b>2</b>  | <b>11682017</b>  | <b><i>GREB1</i></b>      | <b>1.20</b>     | <b>1.04-1.38</b> | <b>0.012</b> |
| cg11608150        | 5         | 135415948        | <i>unannotated</i>       | 0.93            | 0.81-1.08        | 0.368        |
| <b>cg01741999</b> | <b>2</b>  | <b>219137824</b> | <b><i>PNKD</i></b>       | <b>1.23</b>     | <b>1-1.51</b>    | <b>0.045</b> |
| cg01074083        | 16        | 17516862         | <i>XYLT1</i>             | 0.97            | 0.84-1.13        | 0.728        |
| cg02096220        | 4         | 129212177        | <i>unannotated</i>       | 1.03            | 0.9-1.19         | 0.657        |
| <b>cg03916490</b> | <b>7</b>  | <b>1080558</b>   | <b><i>C7orf50</i></b>    | <b>0.83</b>     | <b>0.71-0.96</b> | <b>0.010</b> |
| <b>cg27639199</b> | <b>15</b> | <b>81666528</b>  | <b><i>TMC3</i></b>       | <b>1.18</b>     | <b>1.02-1.36</b> | <b>0.024</b> |
| cg25188166        | 3         | 119420208        | <i>unannotated</i>       | 0.96            | 0.83-1.11        | 0.562        |
| cg05865327        | 14        | 102274741        | <i>PPP2R5C</i>           | 1.05            | 0.9-1.21         | 0.541        |
| cg23947138        | 13        | 114782778        | <i>RASA3</i>             | 0.89            | 0.77-1.02        | 0.092        |
| cg05187003        | 21        | 34641507         | <i>IL10RB</i>            | 1.00            | 0.86-1.16        | 0.976        |

**Supplementary Table 4**

The risk of breast cancer in the general population (Melbourne Collaborative Cohort Study) calculated by carrier probabilities.

| Site              | Chr.      | Position         | UCSC ref                 | OR          | 95% CI           | p            |
|-------------------|-----------|------------------|--------------------------|-------------|------------------|--------------|
| cg06536614        | 5         | 135416381        | <i>MIR886 (VTRNA2-1)</i> | 1.05        | 0.69-1.61        | 0.825        |
| cg10306192        | 11        | 102576374        | <i>MMP27</i>             | 1.09        | 0.79-1.49        | 0.604        |
| cg18110333        | 6         | 292329           | <i>DUSP22</i>            | 0.75        | 0.49-1.15        | 0.187        |
| cg00124993        | 5         | 135416412        | <i>MIR886 (VTRNA2-1)</i> | 1.52        | 0.96-2.41        | 0.076        |
| cg26328633        | 5         | 135416394        | <i>MIR886 (VTRNA2-1)</i> | 1.24        | 0.80-1.94        | 0.339        |
| cg25340688        | 5         | 135416398        | <i>MIR886 (VTRNA2-1)</i> | 1.07        | 0.69-1.68        | 0.753        |
| cg18514595        | 22        | 49579968         | <i>unannotated</i>       | 0.68        | 0.49-0.94        | 0.018        |
| cg26896946        | 5         | 135416405        | <i>MIR886 (VTRNA2-1)</i> | 1.25        | 0.78-2.01        | 0.350        |
| cg11035303        | 3         | 43465503         | <i>ANO10</i>             | 1.42        | 0.95-2.12        | 0.084        |
| cg23012654        | 14        | 97493395         | <i>unannotated</i>       | 1.14        | 0.80-1.64        | 0.472        |
| cg26773954        | 13        | 111969980        | <i>unannotated</i>       | 0.89        | 0.63-1.25        | 0.496        |
| cg22901919        | 4         | 141317067        | <i>CLGN</i>              | 1.17        | 0.84-1.62        | 0.360        |
| cg04417708        | 17        | 4043867          | <i>ZZEF1</i>             | 1.02        | 0.72-1.44        | 0.928        |
| <b>cg18584561</b> | <b>2</b>  | <b>11682017</b>  | <b><i>GREB1</i></b>      | <b>0.63</b> | <b>0.42-0.94</b> | <b>0.023</b> |
| cg11608150        | 5         | 135415948        | <i>unannotated</i>       | 0.98        | 0.53-1.80        | 0.946        |
| <b>cg01741999</b> | <b>2</b>  | <b>219137824</b> | <b><i>PNKD</i></b>       | <b>1.34</b> | <b>0.87-2.05</b> | <b>0.182</b> |
| cg01074083        | 16        | 17516862         | <i>XYLT1</i>             | 0.92        | 0.65-1.31        | 0.639        |
| cg02096220        | 4         | 129212177        | <i>unannotated</i>       | 0.78        | 0.53-1.14        | 0.202        |
| <b>cg03916490</b> | <b>7</b>  | <b>1080558</b>   | <b><i>C7orf50</i></b>    | <b>0.85</b> | <b>0.59-1.23</b> | <b>0.391</b> |
| <b>cg27639199</b> | <b>15</b> | <b>81666528</b>  | <b><i>TMC3</i></b>       | <b>0.70</b> | <b>0.51-0.96</b> | <b>0.029</b> |
| cg25188166        | 3         | 119420208        | <i>unannotated</i>       | 1.18        | 0.84-1.66        | 0.330        |
| cg05865327        | 14        | 102274741        | <i>PPP2R5C</i>           | 0.81        | 0.56-1.17        | 0.263        |
| cg23947138        | 13        | 114782778        | <i>RASA3</i>             | 0.80        | 0.56-1.15        | 0.232        |
| cg05187003        | 21        | 34641507         | <i>IL10RB</i>            | 0.92        | 0.63-1.34        | 0.656        |
