# Supplementary material for: Heritable DNA methylation marks associated with susceptibility to breast cancer
Source: PubMed Central journal article supplement (PMC5830448; doi:10.1038/s41467-018-03058-6), 2018-02-28
Supplement: 41467_2018_3058_MOESM3_ESM.pdf [file 41467_2018_3058_MOESM3_ESM.pdf]

## Description of Additional Supplementary Files

File Name: Supplementary Data 1

Description: The 1,000 most Mendelian probes, showing the probe name, the statistic  $\Delta I$ , the maximized log-likelihoods  $I_{\text{mix}}$  and  $I_{\text{Mendel}}$  and the Mendelian model's maximum likelihood estimates of the M-value mean and standard deviation for non-carriers ( $\mu_0$  and  $sd_0$ , respectively) and carriers ( $\mu_1$  and  $sd_1$ , respectively).

File Name: Supplementary Data 2

Description: Families and participants included in this study. Families and individuals were deidentified.
